# A molecular rack and pinion actuates a cell-surface adhesin and enables bacterial gliding motility

Authors: Abhishek Shrivastava and Howard C. Berg

Affiliation: Department of Molecular and Cellular Biology, Harvard University,  
Cambridge, MA 02138

Corresponding author: Howard C. Berg and Abhishek Shrivastava

Email: [hberg@mcb.harvard.edu](mailto:hberg@mcb.harvard.edu) and [ashrivastava@fas.harvard.edu](mailto:ashrivastava@fas.harvard.edu)

**Abstract.** The mechanism for bacterial gliding is not understood. The gliding bacterium *Flavobacterium johnsoniae* is known to have an adhesin, SprB, that moves along the cell surface on a spiral track. When cells are sheared by passage of a suspension through thin tubing, they stop gliding but can be tethered by addition of an anti-SprB antibody. Tethered cells spin about 3 Hz. We labeled the Type 9 secretion system (T9SS) with a yellow-fluorescent-protein (YFP) fusion of GldL. When labeled cells were tethered, a yellow fluorescent spot was found near the rotation axis, which shows that the motor that drives the rotation localizes with the T9SS. The spiral track was labeled by following the motion of Cy3-labeled SprB. The distance between the rotation axis and the track was determined by a measurement involving both labels, YFP and Cy3, yielding 90 nm. If a rotary motor spins a pinion of radius 90 nm 3 Hz, a spot on its periphery will move 1.5  $\mu\text{m/s}$ , the speed at which cells glide. We suggest that the pinion drives a flexible tread that carries SprB along a track fixed to the cell surface. Cells glide when such an adhesin adheres to the solid substratum.

**Introduction.** Rod-shaped gliding bacteria move in a manner similar to a self-propelled screw, i.e., they roll along their long axis as they move forward on an external surface<sup>1,2</sup>. Bacteria related to *Flavobacterium johnsoniae*, which is the fastest of all known gliders, are present in diverse environments such as the human oral microbiome<sup>3</sup>, fish scales<sup>4</sup>, water bodies<sup>5</sup>, and plant rhizosphere<sup>6</sup> where they glide over and colonize their preferred surfaces. How the molecular players form the machinery that actuates this motion is not clearly understood. *Flavobacterium johnsoniae* is now the organism of choice for studies of this process, because rates of movement are high and much of the genetics

is known<sup>7,8</sup>. A mobile cell-surface adhesin, SprB, has been identified that plays a central role in gliding<sup>9,10</sup>. Tracking of SprB in 3D space has revealed the presence of a spiral cell-surface track on which SprB moves<sup>1</sup>. Cells subjected to viscous shear stop gliding, but they can be tethered to an external surface using anti-SprB antibody. Tethered cells pinwheel around a fixed axis, suggesting that a rotary motor that generates high torque is a part of the gliding machinery<sup>11</sup>.

Bacterial motility machines have external components, so are coupled with protein secretion systems. The flagellar motor is associated with the Type 3 secretion system<sup>12,13</sup>, and the Type 4 pili motor is associated with the type 2 secretion system<sup>14-16</sup>. In *Flavobacterium*, the Type 9 secretion system (T9SS) is required for the secretion of SprB, and cells lacking the T9SS are non-motile<sup>17</sup>. T9SS spans the inner and outer membranes and the periplasmic region. The T9SS has an outer membrane barrel made up of a protein SprA. It is one of the largest transmembrane  $\beta$  barrels known in biology<sup>18</sup>. Structural data suggest that in the periplasmic region, the T9SS forms at least one ring-shaped structure that contains GldK, while GldM spans the periplasmic region<sup>19,20</sup>. GldL is a cytoplasmic membrane protein and is one of the core T9SS proteins<sup>17</sup>. Our results suggest that T9SS is associated with the rotary component of the gliding motor and drives a tread carrying the adhesin SprB along a track fastened to the rigid framework of the cell wall.

## Results and Discussion.

**The axis of rotation is localized near GldL.** GldK, GldL, GldM, GldN, SprA, SprE, SprF and SprT are the core T9SS proteins required for the transport of SprB to the

external surface.  $\Delta gldL$  mutants lack SprB and are not able to stick to a glass surface<sup>17</sup>. We found that sheared and tethered cells of  $\Delta gldL$  mutants complemented by GldL-YFP were able to bind to glass and exhibited wild-type levels of cell rotation (Movie 1). This suggests that the rotary motor is fully functional in this strain.

Fluorescent GldL-YFP appeared as spots that were fixed in the frame of reference of a cell (Fig. 1B & Movie 2). Using the ImageJ and custom MATLAB codes C1-C3 that fit a 3D gaussian to each GldL spot, the positions of GldL foci from 42 cells were determined. Custom MATLAB codes used in this article are freely available on GitHub <https://github.com/Abhishek935/Molecular-Rack-and-Pinion>. The GldL spots appeared to be localized at random within a cell, with the average distance between two neighboring spots about 1.5  $\mu\text{m}$  (Fig. S1). The peak of a gaussian fit to a frequency distribution of number of foci per cell as measured from 42 cells is 3.47 with a S.D. of 0.87 (Fig. 1A). The Total Internal Reflection Fluorescence (TIRF) microscope used for these measurements strongly illuminates only the cylindrical face of the cell adjacent to the glass with a penetration depth around 100 nm. A similar distribution of GldL is expected on the opposite cylindrical face. Hence, the total number of GldL foci per cell is about 7.

Using tethered cells of  $\Delta gldL$  background complemented with GldL-YFP, the position of the axis of rotation was determined by adding successive images of an image stack of a rotating cell and fitting the new matrix that contains the sum of images with a 3D gaussian that has the X-Y coordinates as position and the Z coordinate as intensity. Code C4 was used to add successive images. Given that the axis of rotation remains fixed over all image frames of a rotating cell, for a matrix that contains the sum of

stacks, the intensity is highest at the axis of rotation. All GldL foci in a rotating cell were tracked over several frames. All but one GldL spot per tethered cell showed a circular trajectory (Fig. 1B). The foci that did not move with an apparent circular trajectory were within a distance range of few hundred nanometers from the axis of rotation (Fig. 1C). This spot was named the 'nearest neighbor' GldL.

Similar measurements were made for each image frame from image stacks of 8 rotating tethered cells with 60 frames on average per image stack. This provided a total of 484 measurements. The standard deviations for the gaussians fit to the images of the rotation axes and the nearest-neighbor GldL foci bloom up to resolving power of the microscope. The position of nearest neighbor GldL relative to the axis of rotation is shown for all 8 cells in Fig. 2A, with the axis of rotation normalized to be at the origin. The position of nearest neighbor GldL relative to the axis of rotation, one cell at a time, is shown in Fig. S2. The peak of a gaussian fit to a frequency distribution of distance between the nearest neighbor GldL and the axis of rotation for all 484 measurements was 109.7 nm with a S.D. of 68.5 nm (Fig. 2B). These measurements tell us that the axis of rotation was found near a GldL spot, as expected if GldL is part of the rotary motor. However, we do not know whether GldL is centered on the rotation axis.

**Cell rotation and SprB motion utilize the same power source.** A preparation of tethered cells was exposed to 10  $\mu$ M carbonyl cyanide-m-chlorophenylhydrazone (CCCP), which is known to abolish the protonmotive force that acts across the inner cell membrane<sup>21</sup>. The cells stopped rotating after the addition of CCCP and started rotating again after its removal (Fig. S3, S4 and Movie 3). The loss of rotation was rapid and the

recovery was gradual, taking about 4 times longer, as expected if time was required to wash CCCP out of the cells. These results are consistent with previous observations where motion of SprB was stopped after the addition of CCCP and was restored after washing it away<sup>10</sup>. This suggests that both cell rotation and SprB translocation utilize the same fuel.

A22, a drug that alters the motion of MreB and stops the gliding of *Myxococcus xanthus*<sup>22</sup>, did not affect the gliding of *F. johnsoniae* (Fig. S5). As in *F. johnsoniae*, binding of a cell-surface adhesin to an external surface results in gliding of *M. xanthus*. However, there are obvious differences between the gliding of the two types of bacteria. *M. xanthus* uses different motility proteins and glides about 60 times more slowly than *F. johnsoniae*. Since MreB helps in building the cell wall to which the *F. johnsoniae* gliding machinery is attached, MreB might play a role in the assembly of that machinery.

**The track on which SprB moves is close to the gliding motor.** While the motor labeled by GldL-YFP is fixed on the cell surface, the SprB adhesin moves along the length of the cell. How rotation might be coupled to linear motion is a puzzle. The  $\Delta gldL$  strain is complemented fully for rotary motor function by the addition of GldL-YFP. However, long distance motion of the cell and the adhesin SprB is not fully restored. This suggests that the C-terminal region of GldL might play a role in coupling the rotary motor with the motion of SprB. Recently, it was found when the C-terminal 8-13 amino acid regions of GldJ are deleted, secretion via the T9SS is fine while motion of SprB on the cell-surface is significantly reduced<sup>23</sup>. In order to restore long distance movement of SprB in a *gldL-yfp* strain, a *gldL-yfp*-containing plasmid was added to wild-type cells to

form a hybrid motor containing both GldL and GldL-YFP subunits. A Cy3 tag was attached to SprB and the positions of both SprB and GldL were determined within same cells (Fig. 3A, S6, and Movie 4). The shortest distance between the trajectory of SprB labeled with Cy3 and motors labeled with GldL-YFP was measured for 42 motors from 10 cells. The average positions of SprB labeled with Cy3 and GldL-YFP (motor) were determined by fitting 3D gaussians to respective foci from all frames of an image stack. The positions of motors were at a distance ( $d$ ) of 90.9 nm with a S.D. of 63.7 nm from the SprB trajectory (Fig. 3B).

As a control, a simulation in which 42 motors were randomly localized in one cell was performed, together with the SprB trajectory from one cell. This simulation was carried out using a random number generator in MATLAB and the similar boundaries as that of a cell in an image plane were used. The shortest distances between the motors and the track were measured for the simulation. The distribution for these distances was broad and did not show a discernible peak near 90 nm (Fig. 3C and 3D).

Tracks carrying SprB did not loop around GldL spots. This argues against a model in which chains carrying SprB are driven by sprockets<sup>7</sup>. A viable alternative, explained below, involves racks and pinions.

**A model for gliding is suggested in which a pinion attached to the rotary motor's drive shaft engages a rack (a tread) that slides along a track fixed to the rigid framework of the cell wall.** A cartoon illustrating this idea is shown in Fig. 4A. A pinion (a circular gear) and a rack (a straight element with teeth matching those on the gear) is a common device for converting rotary motion into linear motion. If the motor

rotates at frequency  $f$  and the radius of the pinion is  $r$ , then the rack will move at velocity  $v = 2\pi r f$ , which is the gliding speed, about  $1.5 \mu\text{m/s}$ . Given the maximum  $f$  that the rotary motor exhibits of about  $3 \text{ Hz}$ <sup>7</sup>, we find  $r = v/2\pi f = 80 \text{ nm}$ , which is on the mark.

The rotary motor, although it runs at constant speed<sup>11</sup>, could be similar in architecture to the flagellar rotary motor, with a rotor embedded in the inner cell membrane surrounded by stator elements anchored to the peptidoglycan layer and a drive shaft that passes through the peptidoglycan with the aid of a bushing. The pinion would be mounted on the drive shaft but could rotate under or within the outer cell membrane, driving the tread along a track anchored to the peptidoglycan. Only SprB needs to extend beyond the outer cell membrane. An animation of the behavior of our model is shown in Fig. 4B and Movie 5.

**Multiple SprB's ensure smooth gliding.** If several SprB are mounted on a given tread, a cell can glide continuously. Typically, there are 40 SprB on a given track, or 20 on one cylindrical face of a cell. A SprB arriving at the back of a cell can peel off the substrate to be replaced by new SprB adsorbed to the substrate at the front of the cell. As a result, the cell can glide smoothly over many body lengths. However, if a single SprB is mounted on a given tread, that SprB will remain fixed and the free end of the cell will lift off the surface and flip over, allowing the cell to continue to glide in the same direction but without any net progress. Gliding cells often display flips, i.e., the lagging pole of a cell gliding in the x-y image plane gets stuck to glass, the leading pole rises up along the z axis and moves rapidly forming an arc such that it moves behind the lagging pole (Fig. S7 and Movie 5). The flips are illustrated in Fig. 1 and Movie S1 of ref. 7 and

in Fig. 4 of ref. 24. At the time of the early work<sup>24</sup>, no gliding motility proteins were known; all that could be surmised was that sites able to adhere to the substrate moved the length of a cell along tracks fixed to the rigid framework of the cell wall.

Future experiments will be aimed towards identification of the proteins that comprise the gliding machinery. Several *F. johnsoniae* mutants are deficient in proteins that either form the T9SS or are involved in the stability of the T9SS proteins. In these mutants, SprB is not secreted to the cell-surface and the cells do not glide. Of more interest are mutants that do secrete SprB to the cell surface but, nonetheless, are not able to glide. An example are cells that lack the C-terminal region of GldJ<sup>23</sup>, a protein that is not a part of the T9SS. GldJ localizes helically, is an outer membrane lipoprotein<sup>25</sup>, and is presumably a part of the tread/track complex. Identification of other components of the rack and pinion assembly will enhance our understanding of bacterial gliding.

## Methods.

**Strains and plasmids.** A GldL-YFP fusion was generated by amplifying eYFP from pHL55<sup>26</sup> using primers P65 and P67 (for primers, see Supplementary Information) and cloning it into the vector pCP23. *gldL* was amplified using primers P63 and P64 and was cloned into pCP23 with YFP to generate the plasmid pAS6 such that the C-terminus of GldL was fused with the N-terminus of YFP. Strains were grown at 25°C with shaking, as described previously<sup>1</sup>.

**TIRF imaging of GldL in tethered cells.** Cells were tethered using a protocol described previously<sup>11</sup>. To image rotating tethered bacteria with GldL-YFP, a microscope (Nikon Eclipse Ti-U; Nikon, Melville, NJ) with an Apo TIRF 60x 1.49 numerical aperture (NA) objective was used in TIRF mode. A 515 nm, 25 mW laser was used as an excitation source. Fluorescent images were recorded with an Andor Ixon Camera. Phase-contrast images were recorded at the same time in the near infrared using a ThorLabs DCC1545M-GL camera. Images were analyzed using the ImageJ plugin Trackmate<sup>27</sup> and custom MATLAB codes.

**Simultaneous TIRF imaging of SprB and GldL.** SprB was labeled with Cy3 as follows: 2  $\mu$ L of 1:10 diluted purified anti-SprB antibody and 2  $\mu$ L of Cy3 conjugated Goat Anti Rabbit IgG Polyclonal Antibody (VWR R611-104-122) were added to 40  $\mu$ L of 0.4 O.D. bacterial culture and incubated for 10 min at 25°C. After incubation, the preparation was centrifuged at 12,000 x g for 5 min. The supernatant fraction was discarded and the pellet was re-suspended in 40  $\mu$ L of motility medium (MM). A tunnel slide was prepared, 40  $\mu$ L of 10 mg/mL BSA was added to the tunnel and allowed to stand for 1 min, after which the Cy3-labeled cells were flowed into one end of the tunnel, and a Kimwipe was used to wick the excess fluid from the other end. This preparation was allowed to stand for 10 min, and then was washed twice in the tunnel slide with 40  $\mu$ L of MM.

To image YFP and Cy3 signals simultaneously, the TIRF system described above was used with a Photometrics DV2 attachment with yellow and red filters (Chroma ET 535/30 and ET 630/75, respectively) to image YFP on one side of the screen and Cy3 on the other. Using a custom MATLAB code, 3D gaussians with the position along the

x-y axis and intensity along the z axis were fit to the Cy3 and YFP spots in each image frame. The position of the peak of each gaussian fit was recorded as the average position of each spot.

**Addition of CCCP and A22.** Wild-type *F. johnsoniae* cells were sheared and tethered to a glass coverslip and attached to a flow cell, and rotation speed was measured as described previously<sup>11</sup>. A CCCP stock was prepared (10  $\mu$ M in MM and added at the rate of 50  $\mu$ L/min using a syringe pump, Harvard Apparatus 22). To remove the drug, MM was pumped into the flow cell.

A22 (50  $\mu$ g/mL) was added to cells gliding on glass in a tunnel slide, as described previously. Cells were imaged using a phase-contrast microscope with a Nikon Plan 40x BM NA 0.65 objective (Nikon Melville, NY) and a Thorlabs DCC1545M-GL (Thorlabs, Newton, NJ) camera. Images were analyzed using a custom MATLAB code.

## Figure Legends.

**Figure1. The axis of rotation is found near a GldL spot.** **(A)** The distribution of numbers of GldL foci per cell for 42 cells. About 4 GldL foci appeared per cylindrical face of a cell. **(B)** One tethered cell with 5 GldL foci is shown, with one foci numbered 5 close to the axis of rotation; we call it the 'nearest neighbor' GldL. The other foci execute circular arcs as the cell rotates. The foci were spaced about 1.4  $\mu$ m apart. **(C)** Distances of the GldL foci of the tethered cell shown in Fig.1A from the axis of rotation plotted as a function of time.

**Figure2. (A)** A scatter plot of the positions of the nearest neighbor GldL relative to the axis of rotation of 8 tethered cells, with 60 frames on average imaged for each cell, resulting in 484 measurements. For each cell, the axis of rotation was normalized to be at the origin. **(B)** Frequency distribution of the distance of the nearest neighbor GldL from the axis of rotation of 8 tethered cells measured for a total of 484 image frames with about 60 image frames per cell. The peak of a gaussian fit to this distribution is 109.7 nm with a S.D. of 68.47 nm.

**Figure 3. GldL localizes near the track on which SprB moves. (A)** Co-localization of GldL (green circles) with the trajectory of SprB (blue dots and red line). GldL remains fixed relative to the cell. SprB moves along the trajectory shown in red. Blue dots mark the position of SprB observed at different time points. Red lines are second-order polynomial fits to the blue dots. GldL was labeled with YFP and SprB with Cy3. **(B)** Frequency distribution of the distance of 42 motors from SprB trajectories for 10 cells, showing a peak at a distance of 90.9 nm with a S.D. of 63.7 nm. **(C)** A simulation in which 42 motors were localized at random on one cell, with the positions of the motors (green) and the track (red). **(D)** A frequency distribution of distances between the motors and the track.

**Figure 4. A model of the gliding machinery. (A)** A cross-sectional view of a cell with a rotary gliding motor (blue), a mobile tread (green), a stationary track (red), and an adhesin (magenta). The rotary motor and the track are anchored to the peptidoglycan (PG), and the track is wound spirally around the cell. The rotary motor drives a pinion

that engages a mobile tread (rack) that slides along the track. The adhesin, SprB, is attached to the tread and moves with it. The dimension  $d$  is the distance between the axis of rotation of the motor and the center of the track, and  $r$  is the radius of the pinion.

**(B)** A side view of a cell with a rotary motor powering the motion of a tread carrying SprB. See Movie 5 for an animation of this model.

## Movie Legends.

**Movie 1.** A phase-contrast image stack where GldL-YFP strain displays wild-type levels of rotation. Similar to sheared and tethered wild-type cells, two cells in the field of view display rotation. Other cells attach to glass and beads coated with anti-SprB antibody. Some cells and beads display back and forth motion.

**Movie 2.** A tethered cell with 5 fluorescent GldL spots. The cell appears to rotate around a fixed axis.

**Movie 3.** A phase-contrast image stack showing that addition of CCCP stops rotation of a tethered cell.

**Movie 4.** A Cy3-tagged SprB moving along the length of a cell.

**Movie 5.** An animation of the model suggesting how a molecular rack and pinion could drive gliding. The pinion is blue, the tread green, and the adhesin SprB is magenta.

**Movie 6.** A cell gliding smoothly over a glass surface.

**Movie 7.** A gliding cell displaying flips.

Author Contributions: AS and HCB designed the experiments and wrote the paper. AS performed the experiments.

Acknowledgements: This work is supported by National Institutes of Health K99/R00 Grant DE026826 to AS and a R01 Grant AI016478 to HCB.

## References:

- 1 Shrivastava, A., Roland, T. & Berg, H. C. The screw-like movement of a gliding bacterium is powered by spiral motion of cell-surface adhesins. *Biophys J* **111**, 1008-1013, doi:10.1016/j.bpj.2016.07.043 (2016).
- 2 Faure, L. M. *et al.* The mechanism of force transmission at bacterial focal adhesion complexes. *Nature* **539**, 530-535, doi:10.1038/nature20121 (2016).
- 3 Shrivastava, A. *et al.* Cargo transport shapes the spatial organization of a microbial community. *Proc Natl Acad Sci USA* **115**, 8633-8638, doi:10.1073/pnas.1808966115 (2018).
- 4 Duchaud, E. *et al.* Genomic diversity and evolution of the fish pathogen *Flavobacterium psychrophilum*. *Front Microbiol* **9**, 138, doi:10.3389/fmicb.2018.00138 (2018).

- 5 Eiler, A. & Bertilsson, S. Flavobacteria blooms in four eutrophic lakes: linking population dynamics of freshwater bacterioplankton to resource availability. *Appl Environ Microbiol* **73**, 3511-3518, doi:10.1128/AEM.02534-06 (2007).
- 6 Peterson, S. B., Dunn, A. K., Klimowicz, A. K. & Handelsman, J. Peptidoglycan from *Bacillus cereus* mediates commensalism with rhizosphere bacteria from the Cytophaga-Flavobacterium group. *Appl Environ Microbiol* **72**, 5421-5427, doi:10.1128/AEM.02928-05 (2006).
- 7 Shrivastava, A. & Berg, H. C. Towards a model for Flavobacterium gliding. *Curr Opin Microbiol* **28**, 93-97, doi:10.1016/j.mib.2015.07.018 (2015).
- 8 Rhodes, R. G., Pucker, H. G. & McBride, M. J. Development and use of a gene deletion strategy for *Flavobacterium johnsoniae* to identify the redundant motility genes *remF*, *remG*, *remH*, and *remI*. *J. Bacteriol.* **193**, 2418-2428 (2011).
- 9 Nelson, S. S., Bollampalli, S. & McBride, M. J. SprB is a cell surface component of the *Flavobacterium johnsoniae* gliding motility machinery. *J. Bacteriol.* **190**, 2851-2857, doi:10.1128/Jb.01904-07 (2008).
- 10 Nakane, D., Sato, K., Wada, H., McBride, M. J. & Nakayama, K. Helical flow of surface protein required for bacterial gliding motility. *Proc Natl Acad Sci USA* **110**, 11145-11150, doi:10.1073/pnas.1219753110 (2013).
- 11 Shrivastava, A., Lele, P. P. & Berg, H. C. A rotary motor drives flavobacterium gliding. *Curr Biol* **25**, 338-341, doi:10.1016/j.cub.2014.11.045 (2015).
- 12 Erhardt, M., Namba, K. & Hughes, K. T. Bacterial nanomachines: the flagellum and type III injectisome. *Cold Spring Harb Perspect Biol* **2**, a000299, doi:10.1101/cshperspect.a000299 (2010).
- 13 Blocker, A., Komoriya, K. & Aizawa, S. Type III secretion systems and bacterial flagella: insights into their function from structural similarities. *Proc Natl Acad Sci USA* **100**, 3027-3030, doi:10.1073/pnas.0535335100 (2003).
- 14 Chang, Y. W. *et al.* Architecture of the type IVa pilus machine. *Science* **351**, aad2001, doi:10.1126/science.aad2001 (2016).
- 15 Skerker, J. M. & Berg, H. C. Direct observation of extension and retraction of type IV pili. *Proc Natl Acad Sci USA* **98**, 6901-6904 (2001).
- 16 Cisneros, D. A., Pehau-Arnaudet, G. & Francetic, O. Heterologous assembly of type IV pili by a type II secretion system reveals the role of minor pilins in assembly initiation. *Mol Microbiol* **86**, 805-818, doi:10.1111/mmi.12033 (2012).

- 17 Shrivastava, A., Johnston, J. J., van Baaren, J. M. & McBride, M. J. *Flavobacterium johnsoniae* GldK, GldL, GldM, and SprA are required for secretion of the cell surface gliding motility adhesins SprB and RemA. *J Bacteriol* **195**, 3201-3212, doi:10.1128/JB.00333-13 (2013).
- 18 Lauber, F., Deme, J. C., Lea, S. M. & Berks, B. C. Type 9 secretion system structures reveal a new protein transport mechanism. *Nature* **564**, 77-82, doi:10.1038/s41586-018-0693-y (2018).
- 19 Leone, P. *et al.* Type IX secretion system PorM and gliding machinery GldM form arches spanning the periplasmic space. *Nat Commun* **9**, 429, doi:10.1038/s41467-017-02784-7 (2018).
- 20 Gorasia, D. G. *et al.* Structural insights into the PorK and PorN components of the *Porphyromonas gingivalis* Type IX secretion system. *PLoS Pathog* **12**, e1005820, doi:10.1371/journal.ppat.1005820 (2016).
- 21 Harold, F. M. & Baarda, J. R. Inhibition of membrane transport in *Streptococcus faecalis* by uncouplers of oxidative phosphorylation and its relationship to proton conduction. *J Bacteriol* **96**, 2025-2034 (1968).
- 22 Mauriello, E. M. *et al.* Bacterial motility complexes require the actin-like protein, MreB and the Ras homologue, MglA. *Embo J* **29**, 315-326, doi:10.1038/emboj.2009.356 (2010).
- 23 Johnston, J. J., Shrivastava, A. & McBride, M. J. Untangling *Flavobacterium johnsoniae* gliding motility and protein secretion. *J Bacteriol* **200**, doi:10.1128/JB.00362-17 (2018).
- 24 Lapidus, I. R. & Berg, H. C. Gliding motility of *Cytophaga* sp. strain U67. *J. Bacteriol.* **151**, 384-398 (1982).
- 25 Braun, T. F. & McBride, M. J. *Flavobacterium johnsoniae* GldJ is a lipoprotein that is required for gliding motility. *J. Bacteriol.* **187**, 2628-2637 (2005).
- 26 Boehm, A. *et al.* Second messenger-mediated adjustment of bacterial swimming velocity. *Cell* **141**, 107-116, doi:10.1016/j.cell.2010.01.018 (2010).
- 27 Tinevez, J. Y. *et al.* TrackMate: An open and extensible platform for single-particle tracking. *Methods* **115**, 80-90, doi:10.1016/j.ymeth.2016.09.016 (2017).

**Figure 1.**

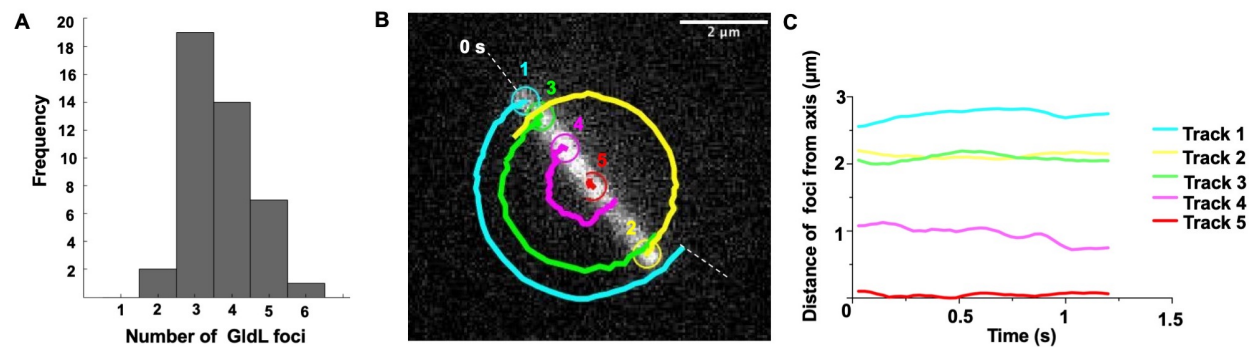

**Figure 2.**

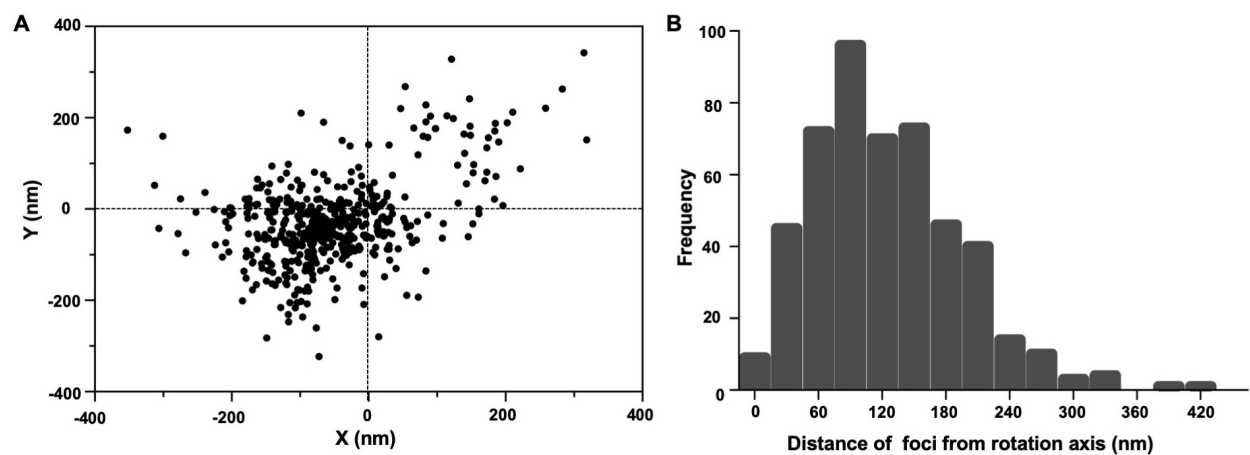

**Figure 3.**

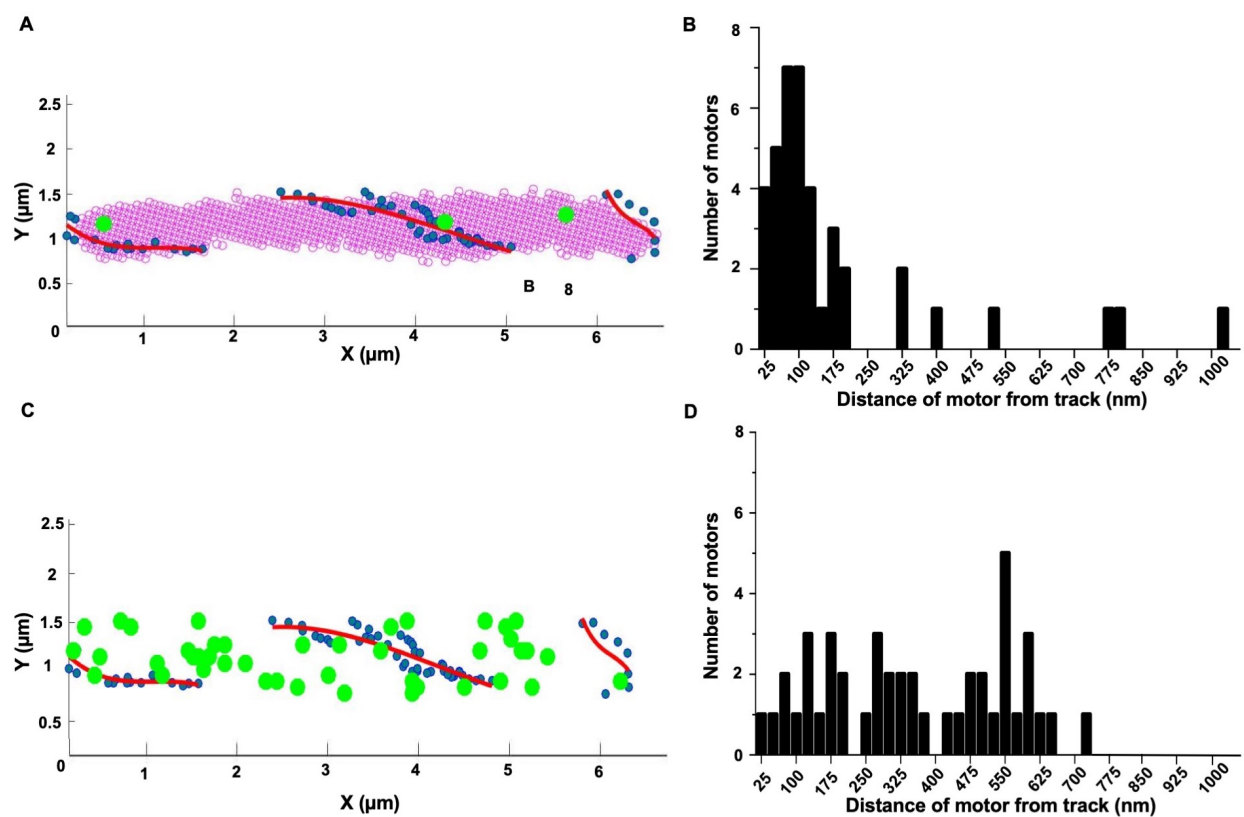

**Figure 4.**

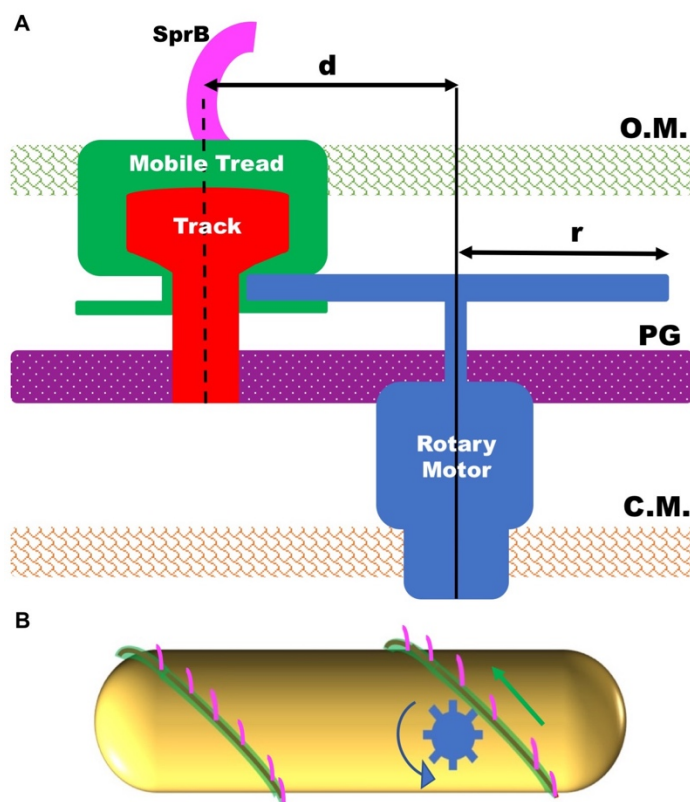

## Supplementary Information

### Supplementary figure legends.

**Figure S1.** A frequency distribution of nearest-neighbor distances between 42 GldL foci found on 10 cells.

**Figure S2.** Position of the nearest neighbor GldL foci from the axis of rotation of 8 tethered cells shown for the individual cells. The axis of rotation is normalized to be at the origin. This data is condensed for all 8 cells in Fig. 2A.

**Figure S3.** Rotation speed of a cell plotted as a function of time. Addition of CCCP stopped the rotation. Removal of CCCP restored the rotation.

**Figure S4.** The rate for the ‘drop’ in rotation speed after addition of CCCP (red linear regression fit) is 4 times faster than the rate of increase following removal of CCCP (green fit).

**Figure S5.** Speed of a smooth gliding cell measured by tracking the center of mass does not change after the addition of A22. The sharp peaks depict flips.

**Figure S6.** Images of a cell with one Cy3 labeled SprB and three GldL-YFP foci. Cell boundary is marked with a dotted line. The track for motion of SprB from Movie 4 is plotted in Fig. 3A.

**Figure S7. (A)** Speed of a smooth gliding cell measured by tracking the center of mass of a gliding cell when plotted as a function of time does not change (Movie 6). **(B)** The speed of cell that displays two flips when plotted as a function of time show two sharp peaks (Movie 7).

## Supplementary Figures.

**Figure S1.**

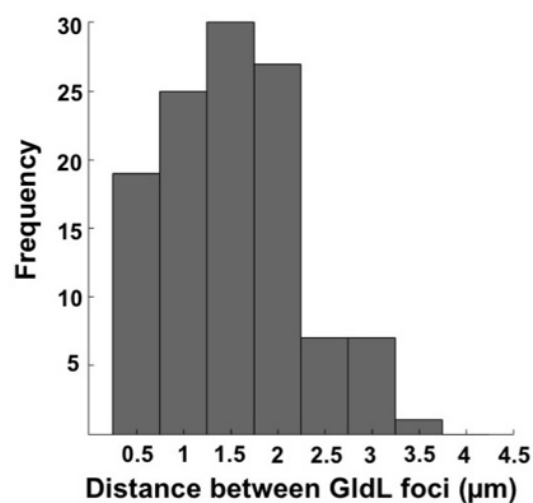

**Figure S2.**

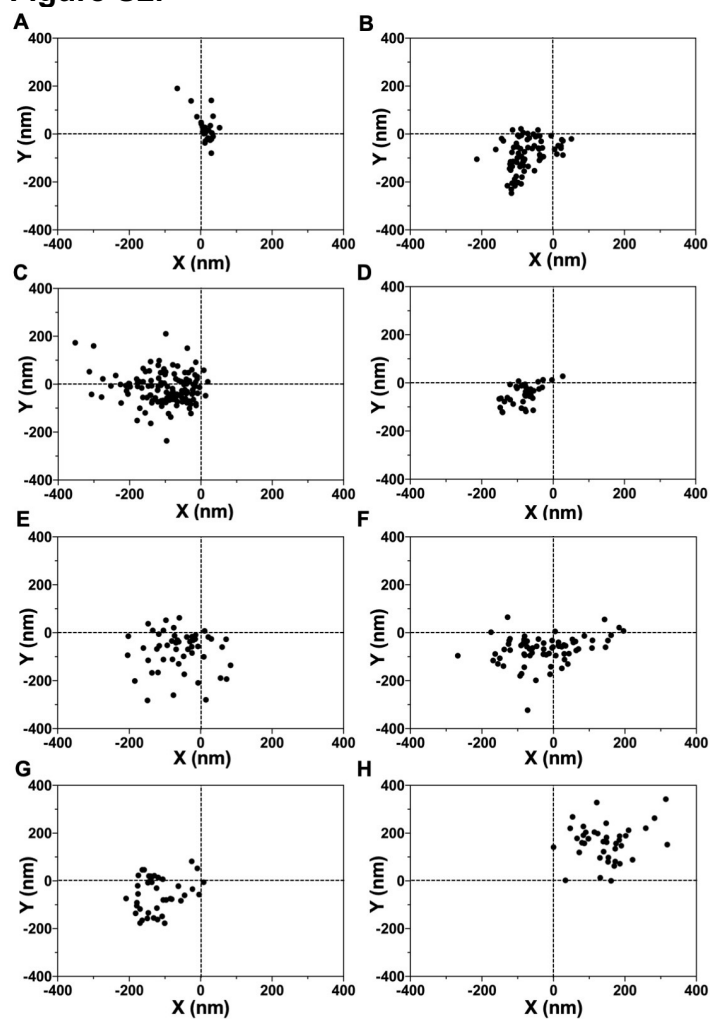

**Figure S3.**

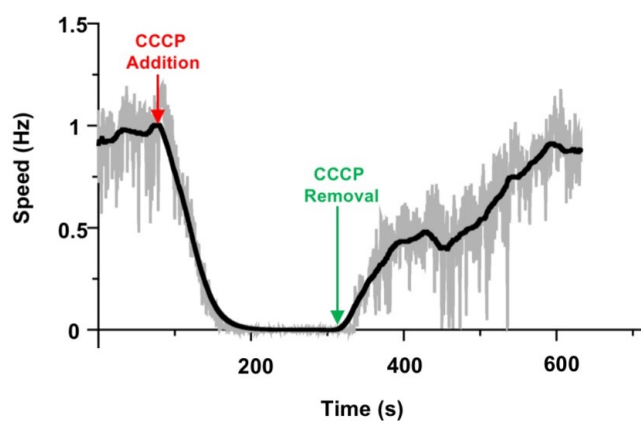

**Figure S4.**

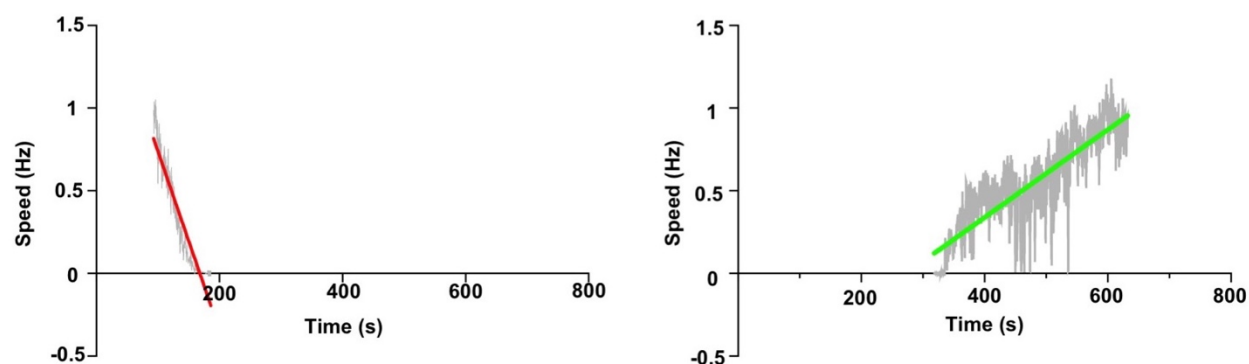

**Figure S5.**

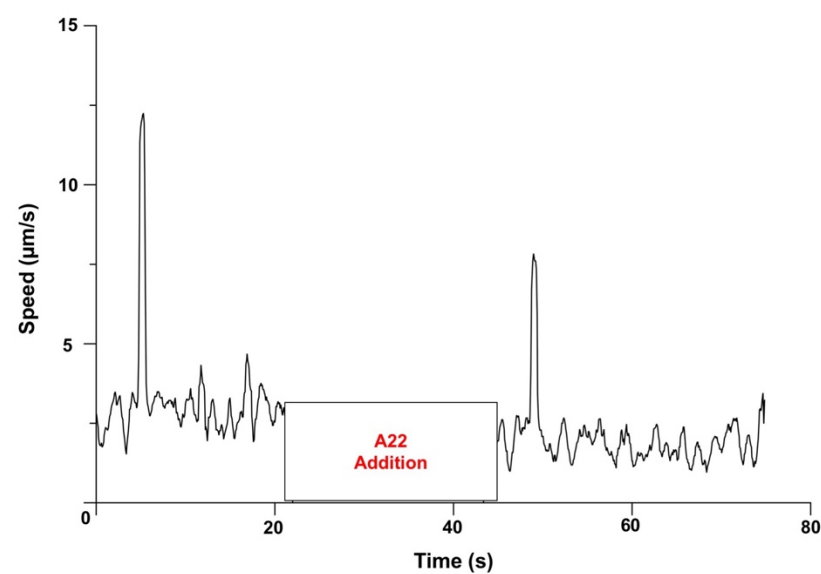

**Figure S6.**

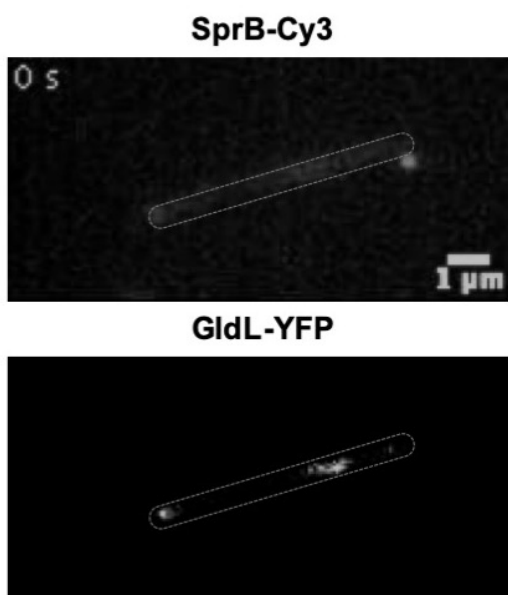

**Figure S7.**

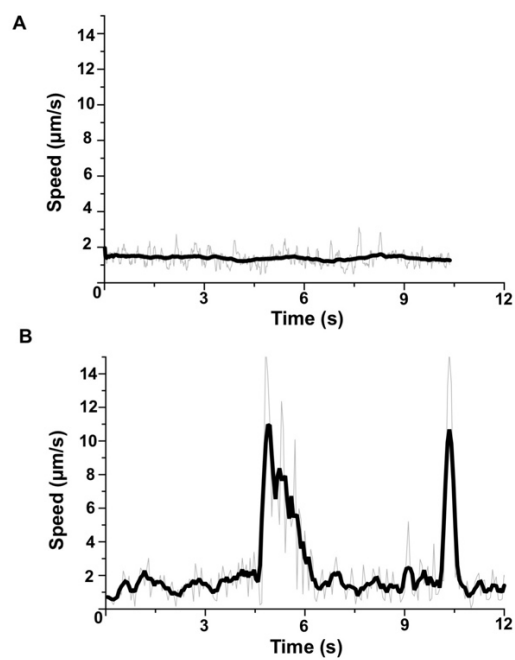

## Primers used in the study.

### P63.

5' GCTAGGGTACCGGAACTCAAGTAACAGGAGGCG 3' forward primer upstream of *gldL*, KpnI site underlined.

### P64.

5' GCTAGGGATCCTCCTTTGTTACTCATTGCAGAAAG 3' reverse primer in *gldL*, BamHI site underlined.

### P65.

5'GCTAGGGATCC**GGAGGTGGA**ATGGTGAGCAAGGGCGAG 3'  
Binds YFP start site in pHL55. BamHI site underlined, 3xG linker in bold.

### P67.

5' GCTAGTCTAG**TTA**CTTGTACAGCTCGTCCATGCCGAGAGTGATCCCGGCGGC 3'  
Binds end region of *yfp*. Stop codon in bold. XbaI site underlined. *gldL-YFP* in the plasmid pCP23 was confirmed by sequencing.

## Computer Scripts.

Custom MATLAB codes used to analyze the data for this article are freely available on GitHub <https://github.com/Abhishek935/Molecular-Rack-and-Pinion>.
